# Supplementary material for: Identifying the Pressure Points of Acute Cadmium Stress Prior to Acclimation in Arabidopsis thaliana
Source: PubMed Central journal article supplement (PMC7503646; doi:10.3390/ijms21176232), 2020-08-28
Supplement: ijms-21-06232-s001.pdf [file ijms-21-06232-s001.pdf]

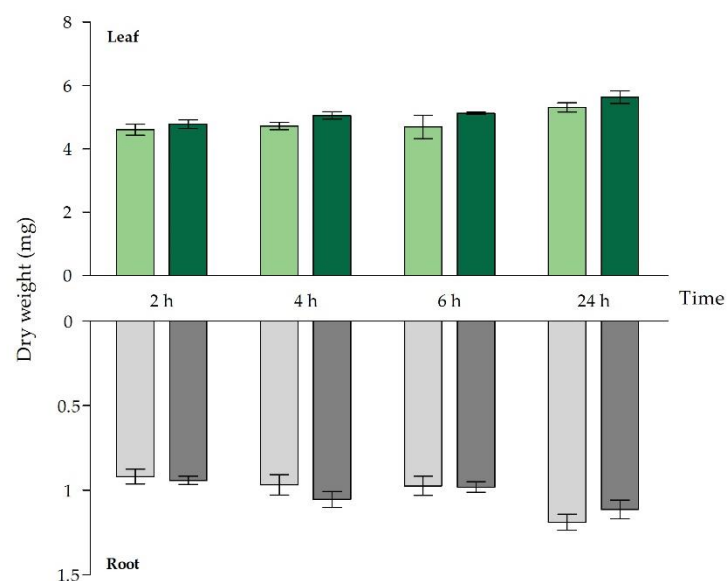

**Figure S1** Rosette (green bars) and root (gray bars) dry weight (mg) of *Arabidopsis thaliana* plants grown under control conditions (0  $\mu\text{M}$  CdSO<sub>4</sub>, light bars) or exposed to 5  $\mu\text{M}$  CdSO<sub>4</sub> (dark bars) during 2 h, 4 h, 6 h and 24 h after 3 weeks of growth. For each time point, data represent the mean  $\pm$  S.E. of 5 biological independent replicates. No significant differences (t-test:  $p < 0.05$ ) were observed between control and exposed plants, within each time point.

**Table S1** Percentage reduced glutathione (GSH) in leaves and roots of *Arabidopsis thaliana* plants grown under control condition (0  $\mu\text{M}$  CdSO<sub>4</sub>) or exposed to 5  $\mu\text{M}$  CdSO<sub>4</sub> during 2 h, 4 h, 6 h and 24 h after 3 weeks of growth. For each time point, data represent the mean  $\pm$  S.E. of 4 biological replicates. Significant differences (t-test:  $p < 0.05$ ) between control and exposed plants, within each time point, are indicated with an asterisk (\*).

| [CdSO <sub>4</sub> ] | Reduced GSH (%)   |                  |                   |                   |
|----------------------|-------------------|------------------|-------------------|-------------------|
|                      | 2 h               | 4 h              | 6 h               | 24 h              |
| <i>Leaf</i>          |                   |                  |                   |                   |
| 0 $\mu\text{M}$      | 97.80 $\pm$ 0.20  | 97.62 $\pm$ 0.43 | 91.70 $\pm$ 0.00  | 97.20 $\pm$ 0.15  |
| 5 $\mu\text{M}$      | 97.97 $\pm$ 0.25  | 95.56 $\pm$ 0.28 | 91.71 $\pm$ 0.00  | 99.07 $\pm$ 0.10* |
| <i>Root</i>          |                   |                  |                   |                   |
| 0 $\mu\text{M}$      | 97.15 $\pm$ 0.27  | 97.13 $\pm$ 0.81 | 94.15 $\pm$ 1.02  | 97.97 $\pm$ 0.54  |
| 5 $\mu\text{M}$      | 98.32 $\pm$ 0.33* | 99.71 $\pm$ 0.41 | 98.24 $\pm$ 0.48* | 98.97 $\pm$ 0.19  |

**Table S2** Sequence of forward and reverse primers used for gene expression analyses (RT-qPCR) of genes of interest. UTR: untranslated region; x2: primer concentration of 600 nM instead of 300 nM, x3: primer concentration of 900 nM instead of 300 nM.

| Genes of interest         |           |                           |                           |                          |               |
|---------------------------|-----------|---------------------------|---------------------------|--------------------------|---------------|
| Gene                      | Locus     | Forward Primer (5'-3')    | Reverse Primer (5'-3')    | Primer Location          | Amplicon Size |
| <i>GSH1</i>               | AT4G23100 | CCCTGGTGAAGTGCCTTCA       | CATCAGCACCTTCATCTCCA      | Exon 10 and 11           | 101 bp        |
| <i>GSH2</i>               | AT5G27380 | GGACTCGTCGTTGGTGACAA      | TCTGGGAATGCAGTTGGTAGC     | Exon 1 and 2             | 101 bp        |
| <i>GR1</i>                | AT3G24170 | CTCAAGTGTGGAGCAACCAAAG    | ATGCGTCTGGTCACACTGC       | Exon 15 and 16           | 101 bp        |
| <i>GGT1</i>               | AT4G39640 | TAGATGTTCCACCACCAGCA      | GGCAATAATGTTGGCTCCTC      | Exon 4 and 5             | 140 bp        |
| <i>ZAT6</i>               | AT5G04340 | TGACCTGCCTTCTTCTTCGT      | GTCCACCAAGAGCCTGGTAA      | No introns               | 113 bp        |
| <i>RBOHC</i>              | AT5G51060 | TCACCAGAGACTGGCACAATAAA   | GATGCTCGACCTGAATGCTC      | Exon 6 and 7             | 101 bp        |
| <i>RBOHD</i>              | AT5G47910 | AACTCTCCGCTGATTCCAACG     | TGGTCAGCGAAGTCTTTAGATTCTT | Exon 1 and 2             | 91 bp         |
| <i>RBOHF</i>              | AT1G64060 | GGTGTGTCATGAACGAAGTTGCA   | AATGAGAGCAGAACGAGCATCA    | Exon 11 and 12           | 105 bp        |
| <i>AT1G05340</i>          | AT1G05340 | TCGGTAGCTCAGGGTAAAGTGG    | CCAGGGCACAACAGCAACA       | Exon 2 and 3<br>op compl | 91 bp         |
| <i>AT1G19020</i>          | AT1G19020 | GAAAATGGGACAAGGGTTAGACAAA | CCCAACGAAAACCAATAGCAGA    | No introns               | 92 bp         |
| <i>AT1G57630</i>          | AT1G57630 | ACTCAAACAGGCGATCAAAGGA    | CACCAATTCGTCAAGACAACACC   | No introns               | 91 bp         |
| <i>AT2G21640</i>          | AT2G21640 | GACTTGTTTCAAAAACACCATGGAC | CACTTCCTTAGCCTCAATTTGCTTC | Exon 1 and 2             | 91 bp         |
| <i>AT2G43510</i>          | AT2G43510 | ATGGCAAAGGCTATCGTTTCC     | CGTTACCTTGCGCTTCTATCTCC   | Exon 1 and 2             | 91 bp         |
| <i>ZAT12</i>              | AT5G59820 | GTGCGAGTCACAAGAAGCCTAACA  | GCGACGACGTTTTACCTTCTTCA   | No introns               | 72 bp         |
| <i>RRTF1</i>              | AT4G34410 | CGGAGCAAGAGCTTTCAGTT      | GCGCTTATCACTGTGCTGTC      | No introns               | 109 bp        |
| <i>ACS2</i>               | AT1G01480 | CATGTTCTGCCTTGCGGATC      | ACCTGTCCGCCACCTCAAGT      | Exon 3 and 4             | 91 bp         |
| <i>ACS6</i> <sup>x3</sup> | AT4G11280 | TTAGCTAATCCCGGCGATGG      | ACAAGATTCACTCCGGTTCTCCA   | Exon 3 and 4             | 92 bp         |
| <i>ACO2</i>               | AT1G62380 | TCTACGTTGTCACCTCCCTCA     | CTCTTACCAAAGTCTTTCATGGCC  | Exon 2 and 3             | 91 bp         |
| <i>ACO4</i>               | AT1G05010 | CTCCGATGTCCCTGATCTCG      | ATCCAGTAGCTCCTCCGACAACCT  | Exon 2 and 3<br>compl    | 91 bp         |
| <i>ERF1</i> <sup>x2</sup> | AT3G23240 | TCCTCGGCGATTCTCAATTTT     | CAACCGGAGAACAACCATCCT     | No introns               | 91 bp         |
| <i>OX11</i>               | AT3G25250 | TAGAGGATCGAACCGGAAAG      | GACCCTTGATTTCTCAACG       | Exon 2                   | 149 bp        |
| <i>MPK3</i>               | AT3G45640 | GACGTTTGACCCCAACAGAA      | TGGCTTTTGACAGATTGGCTC     | Exon 5 and 6             | 103 bp        |
| <i>MPK6</i>               | AT2G43790 | TAAGTTCCTGACAGTGCATCC     | GATGGGCCAATGCGTCTAA       | Exon 5 and 6             | 101 bp        |
| <i>WRKY33</i>             | AT2G38470 | TCATCGATTGTCAGCAGAGACG    | CCATTCCCACCATTTGTTTCAT    | Exon 3 and 4             | 92 bp         |

**Table S3** Sequence of forward and reverse primers used for gene expression analyses (RT-qPCR) of selected reference genes. Exon jn: exon junction UTR: untranslated region

| Reference genes |           |                            |                               |                           |               |
|-----------------|-----------|----------------------------|-------------------------------|---------------------------|---------------|
| Gene            | Locus     | Forward Primer (5'-3')     | Reverse Primer (5'-3')        | Primer Location           | Amplicon Size |
| <i>Root</i>     |           |                            |                               |                           |               |
| <i>UBC21</i>    | AT5G25760 | CTGCGACTCAGGGAATCTTCTAA    | TTGTGCCATTGAATTGAACCC         | Exon jn 3-4<br>and exon 4 | 61 bp         |
| <i>PPR</i>      | AT5G55840 | AAGACAGTGAAGGTGCAACCTTACT  | AGTTTTTGAGTTGTATTTGTCAGAGAAAG | UTR                       | 59 bp         |
| <i>YSL8</i>     | AT5G08290 | TTACTGTTTCGGTTGTCTCCATT    | CACTGAATCATGTTCCAAGCAAGT      | UTR                       | 61 bp         |
| <i>Leaf</i>     |           |                            |                               |                           |               |
| <i>ACT2</i>     | AT3G18780 | CTTGCAACCAAGCAGCATGAA      | CCGATCCAGACACTGTACTTCCTT      | Exon 2                    | 68 bp         |
| <i>PPR</i>      | AT5G55840 | AAGACAGTGAAGGTGCAACCTTACT  | AGTTTTTGAGTTGTATTTGTCAGAGAAAG | UTR                       | 59 bp         |
| <i>MON1</i>     | AT2G28390 | AACTCTATGCAGCATTGATCCACT   | TGATTGCATATCTTTATCGCCATC      | Exon 13 and<br>14         | 61 bp         |
| <i>FBOX</i>     | AT5G15710 | TTTCGGCTGAGAGGTTTCGAGT     | GATTCCAAGACGTAAAGCAGATCAA     | Exon 1                    | 63 bp         |
| <i>UBQ10</i>    | AT4G05320 | GGCCTTGATAATCCCTGATGAATAAG | AAAGAGATAACAGGAACGGAAACATAGT  | UTR                       | 61 bp         |

**Table S4** Reverse transcription quantitative PCR (RT-qPCR) parameters according to the Minimum Information for publication of Quantitative real-time PCR Experiments (MIQE) guidelines based on Bustin *et al.* (2009).

| <b>Sample - Template</b>               |                                                                                                                                                                                                                                                                               |
|----------------------------------------|-------------------------------------------------------------------------------------------------------------------------------------------------------------------------------------------------------------------------------------------------------------------------------|
| <i>SOURCE</i>                          | three-weeks-old <i>Arabidopsis thaliana</i> roots and leaves grown in hydroponics                                                                                                                                                                                             |
| <i>METHOD OF PRESERVATION</i>          | snap frozen in N <sub>2</sub> , long-term storage at -80°                                                                                                                                                                                                                     |
| <i>STORAGE TIME</i>                    | < 6 months                                                                                                                                                                                                                                                                    |
| <i>HANDLING</i>                        | frozen                                                                                                                                                                                                                                                                        |
| <i>EXTRACTION METHOD</i>               | silica-columns: RNAqueous™ Kit (Ambion, Thermo Fisher Scientific, Waltham, MA, USA)                                                                                                                                                                                           |
| <i>RNA; DNA-FREE</i>                   | turbo DNA-free™ Kit (Ambion, Thermo Fisher Scientific, Waltham, MA, USA)<br>use of intron-spanning primers if possible<br>verification of amplicon-specificity via dissociation curve                                                                                         |
| <i>CONCENTRATION</i>                   | NanoDrop® ND-1000 spectrophotometer (Thermo Fisher Scientific, Waltham, Ma, USA)                                                                                                                                                                                              |
| <b>Assay optimisation – validation</b> |                                                                                                                                                                                                                                                                               |
| <i>ACCESSION NUMBER</i>                | see Supplementary Table S1 & S2                                                                                                                                                                                                                                               |
| <i>AMPLICON DETAILS</i>                | see Supplementary Table S1 & S2                                                                                                                                                                                                                                               |
| <i>PRIMERS SEQUENCE</i>                | see Supplementary Table S1 & S2                                                                                                                                                                                                                                               |
| <i>IN SILICO</i>                       | TAIR primer-BLAST <a href="http://www.arabidopsis.org/Blast/index.jsp">http://www.arabidopsis.org/Blast/index.jsp</a>                                                                                                                                                         |
| <i>EMPIRICAL</i>                       | primer concentration of 300 nM unless stated otherwise (Table S1 & S2)<br>annealing temperature of 60°C                                                                                                                                                                       |
| <i>PRIMING CONDITIONS</i>              | combinations of random hexamers and oligo-dT primers                                                                                                                                                                                                                          |
| <i>PCR EFFICIENCY</i>                  | dilution curves of pooled samples (slope, deviation)                                                                                                                                                                                                                          |
| <i>LINEAR DYNAMIC RANGE</i>            | samples are within the range of the efficiency curve                                                                                                                                                                                                                          |
| <b>RT and qPCR</b>                     |                                                                                                                                                                                                                                                                               |
| <i>PROTOCOLS</i>                       | Turbo DNA-free™ Kit (Ambion, Thermo Fisher Scientific, Waltham, MA, USA)<br>PrimeScript™ RT Reagent Kit (Perfect Real Time, Takara Bio Inc., Kusatsu, Japan)<br>Qauntinova™ SYBR® Green PCR kit (Qiagen, Hilde, Germany)<br>as described in the Materials and Methods section |
| <i>REAGENTS</i>                        | as described in the Materials and Methods section                                                                                                                                                                                                                             |
| <i>NTC</i>                             | verification based on Cq-value and dissociation curve                                                                                                                                                                                                                         |
| <b>Data analysis</b>                   |                                                                                                                                                                                                                                                                               |
| <i>SPECIALIST SOFTWARE</i>             | 7500 Fast System Sequence Detection Software, version 1.4.0 (Applied Biosystems, Thermo Fisher Scientific, Waltham, MA, USA)                                                                                                                                                  |

*STATISTICAL JUSTIFICATION*

specified in Materials and Methods section and legends of Figures and Tables

*NORMALISATION*

a selection of at least three reference genes based on the GrayNorm algorithm (Remans *et al.* 2014)

see Materials and Methods section

---
